# Supplementary material
Source: PubMed Central journal article supplement (PMC5522809)

Supplemental Materials to the paper “Missing Data in Alcohol Clinical Trials with Binary Outcomes”

Additional missing data simulation results based on 25-30% missing data:

1. *25-30 percent missing, Any Drinking, N = 500*: Simulated dropout results for dataset with  $N = 500$  sample with 25-30% missing data modeling “any drinking.”
2. *25-30 percent missing, Any Drinking, N = 200*: Simulated dropout results for dataset with  $N = 500$  sample with 25-30% missing data modeling “any drinking.”
3. *25-30 percent missing, Any Heavy Drinking, N = 500*: Simulated dropout results for dataset with  $N = 500$  sample with 25-30% missing data modeling “any heavy drinking.”
4. *25-30 percent missing, Any Heavy Drinking, N = 200*: Simulated dropout results for dataset with  $N = 500$  sample with 25-30% missing data modeling “any heavy drinking.”

Additional missing data simulation results based on 5-10% missing data:

5. *5-10 percent missing, Any Drinking, N = 1000*: Simulated dropout results for dataset with  $N = 1000$  sample with 5-10% missing data modeling “any drinking.”
6. *5-10 percent missing, Any Drinking, N = 500*: Simulated dropout results for dataset with  $N = 500$  sample with 5-10% missing data modeling “any drinking.”
7. *5-10 percent missing, Any Drinking, N = 200*: Simulated dropout results for dataset with  $N = 500$  sample with 5-10% missing data modeling “any drinking.”
8. *5-10 percent missing, Any Heavy Drinking, N = 1000*: Simulated dropout results for dataset with  $N = 1000$  sample with 5-10% missing data modeling “any heavy drinking.”
9. *5-10 percent missing, Any Heavy Drinking, N = 500*: Simulated dropout results for dataset with  $N = 500$  sample with 5-10% missing data modeling “any heavy drinking.”
10. *5-10 percent missing, Any Heavy Drinking, N = 200*: Simulated dropout results for dataset with  $N = 500$  sample with 5-10% missing data modeling “any heavy drinking.”

Additional Last Observation Carried Forward (LOCF) results with different sampling rates from previous time points. Sampling rates from previous time periods are specified in the legends of the corresponding graphs. Standard error estimates did not deviate substantially between methods, and only treatment effect estimates ( $\beta$ ) are shown.:

11. *25-30 percent missing, Any Drinking, LOCF only*: Simulated dropout results for dataset with  $N = 1000, 500, \text{ or } 200$  with 25-30% missing data modeling “any drinking.”
12. *25-30 percent missing, Any Heavy Drinking, LOCF only*: Simulated dropout results for dataset with  $N = 1000, 500, \text{ or } 200$  with 25-30% missing data modeling “any heavy drinking.”
13. *5-10 percent missing, Any Drinking, LOCF only*: Simulated dropout results for dataset with  $N = 1000, 500, \text{ or } 200$  with 5-10% missing data modeling “any drinking.”
14. *5-10 percent missing, Any Heavy Drinking, LOCF only*: Simulated dropout results for dataset with  $N = 1000, 500, \text{ or } 200$  with 5-10% missing data modeling “any heavy drinking.”

1. 25-30 percent missing, Any Drinking, N = 500

### Treatment Effect – Any Drinking

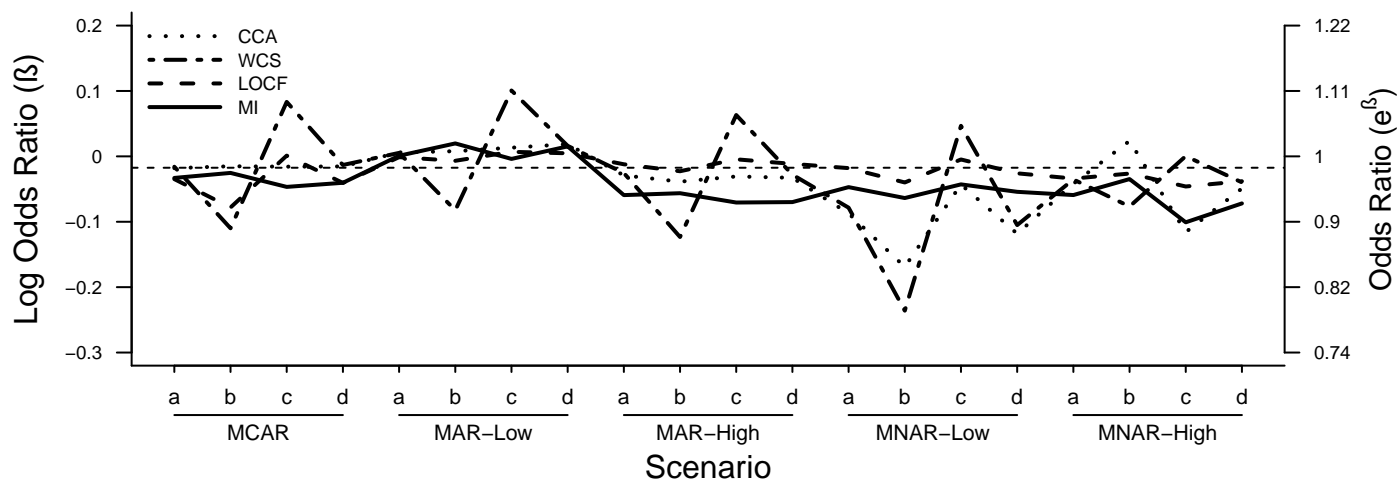

### Treatment Effect Standard Error – Any Drinking

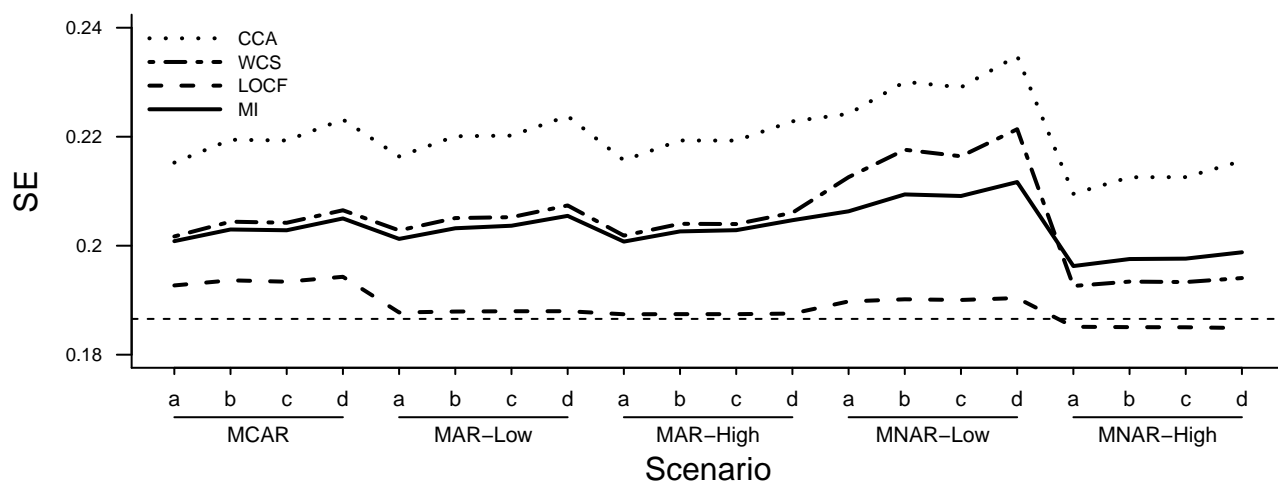

2. 25-30 percent missing, Any Drinking, N = 200

Treatment Effect – Any Drinking

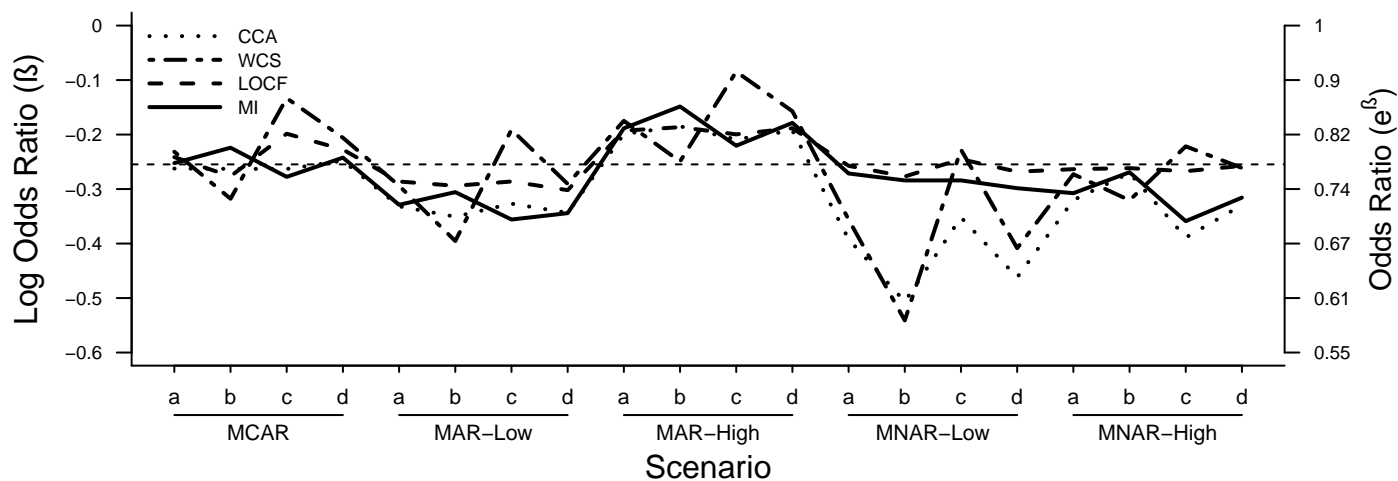

Treatment Effect Standard Error – Any Drinking

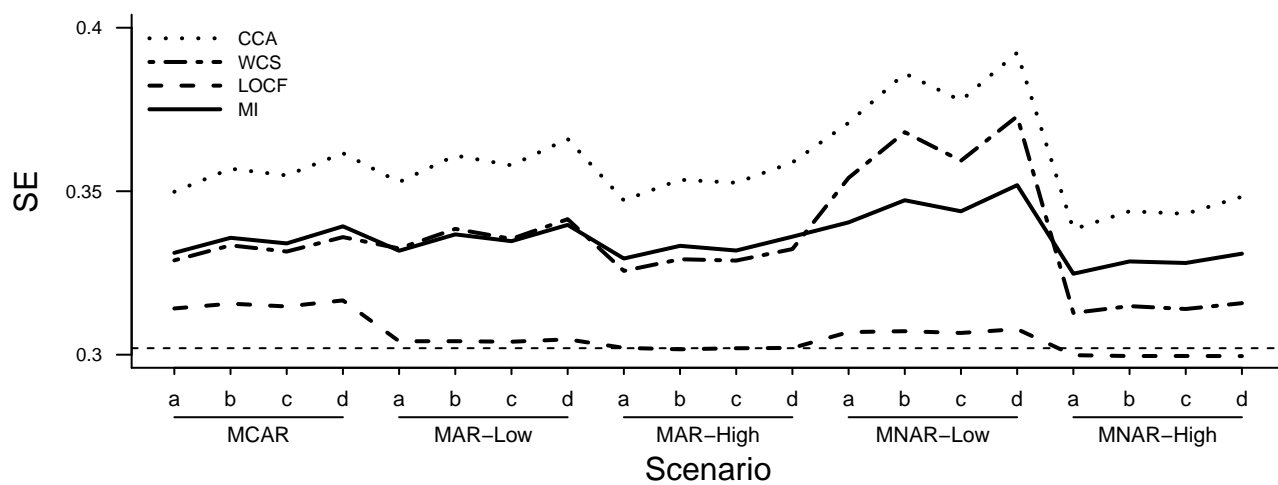

3. 25-30 percent missing, Any Heavy Drinking, N = 500

Treatment Effect – Any Heavy Drinking

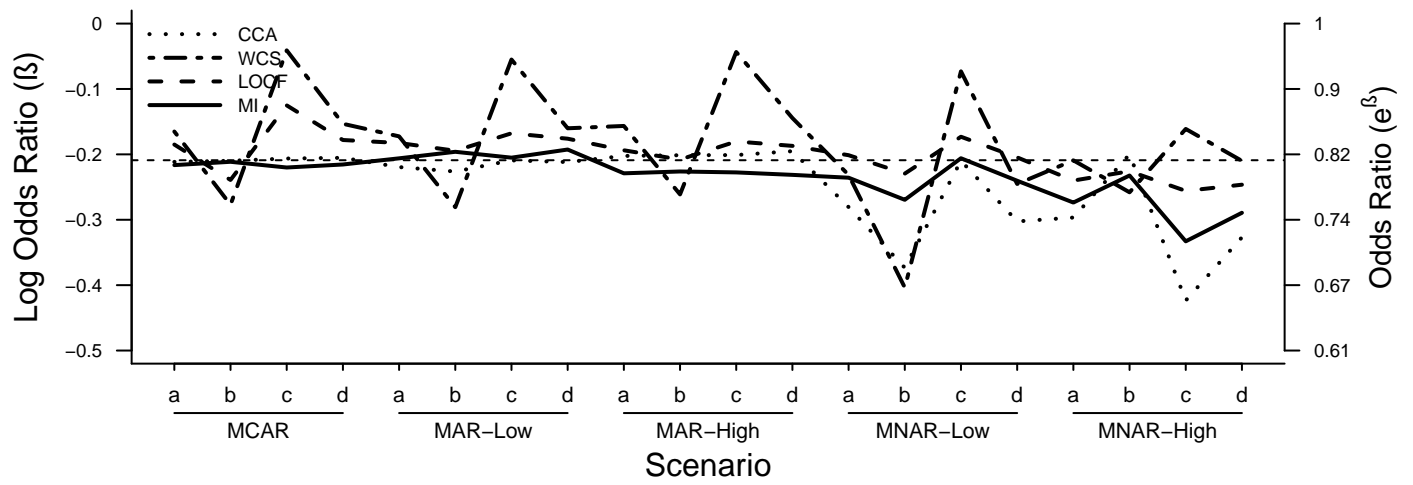

Treatment Effect Standard Error – Any Heavy Drinking

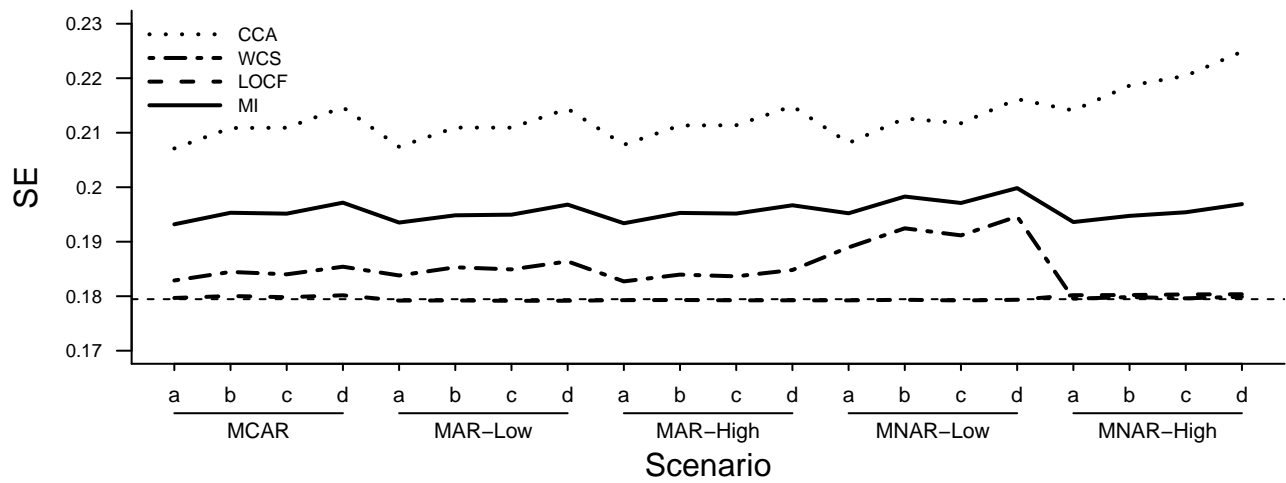

4. 25-30 percent missing, Any Heavy Drinking, N = 200

**Treatment Effect – Any Heavy Drinking**

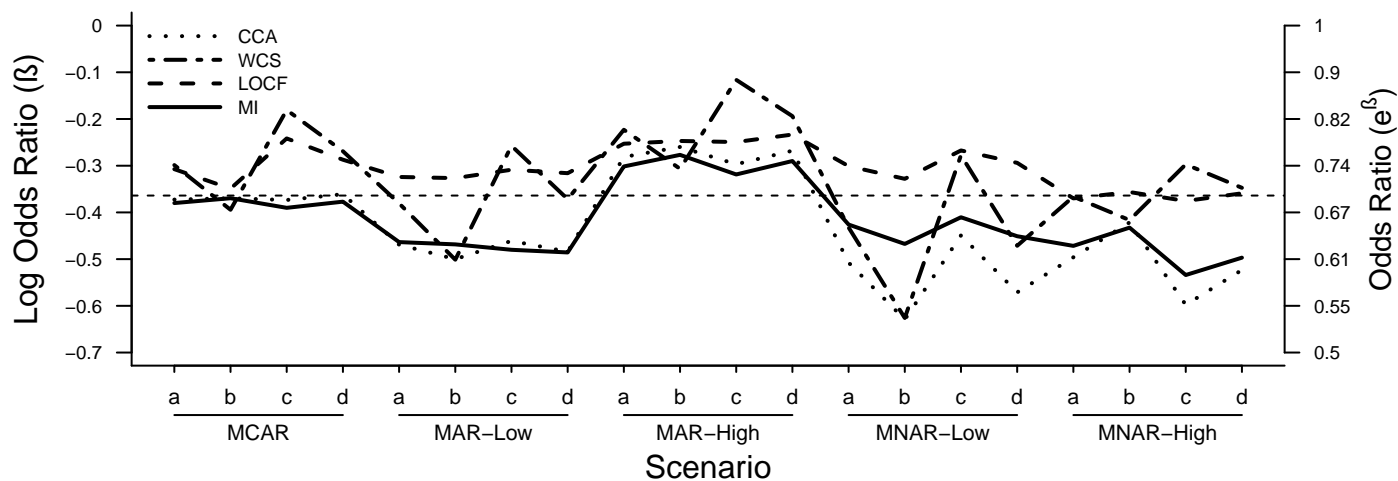

**Treatment Effect Standard Error – Any Heavy Drinking**

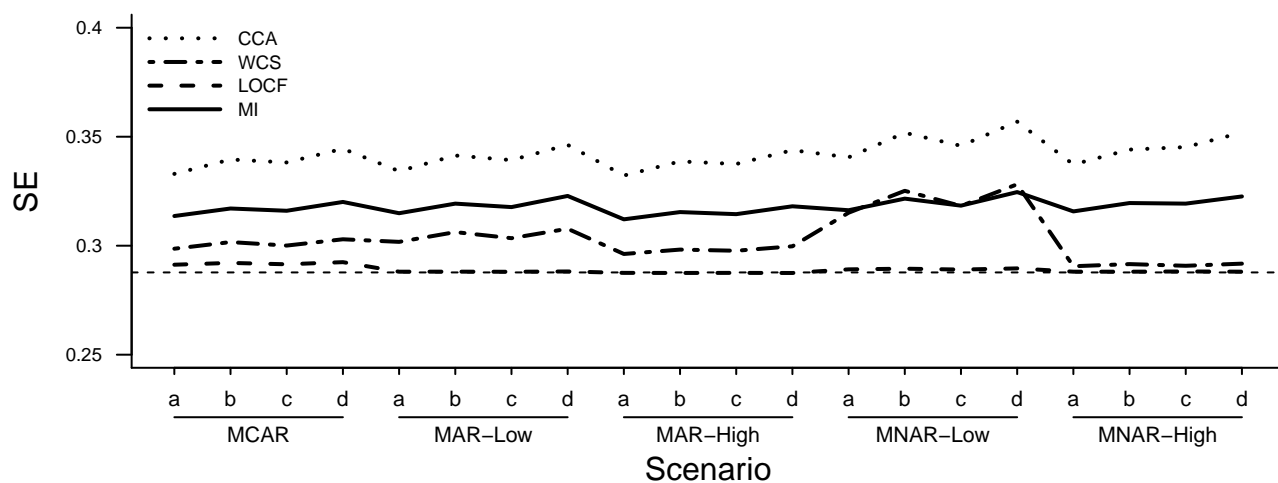

**Treatment Effect – Any Drinking (N = 1000)**

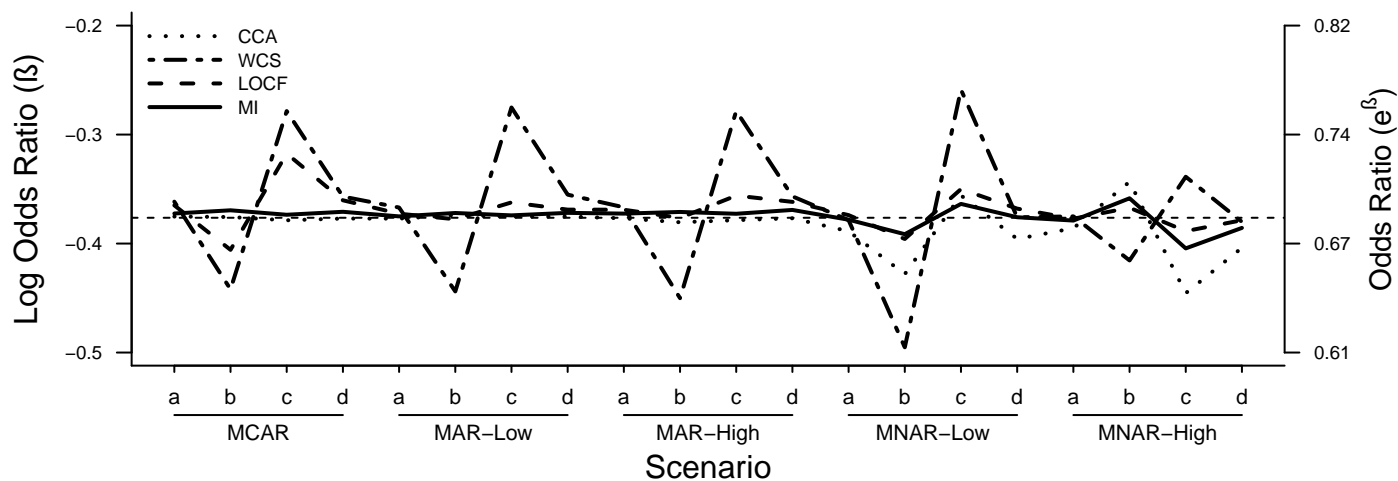

**Treatment Effect Standard Error – Any Drinking**

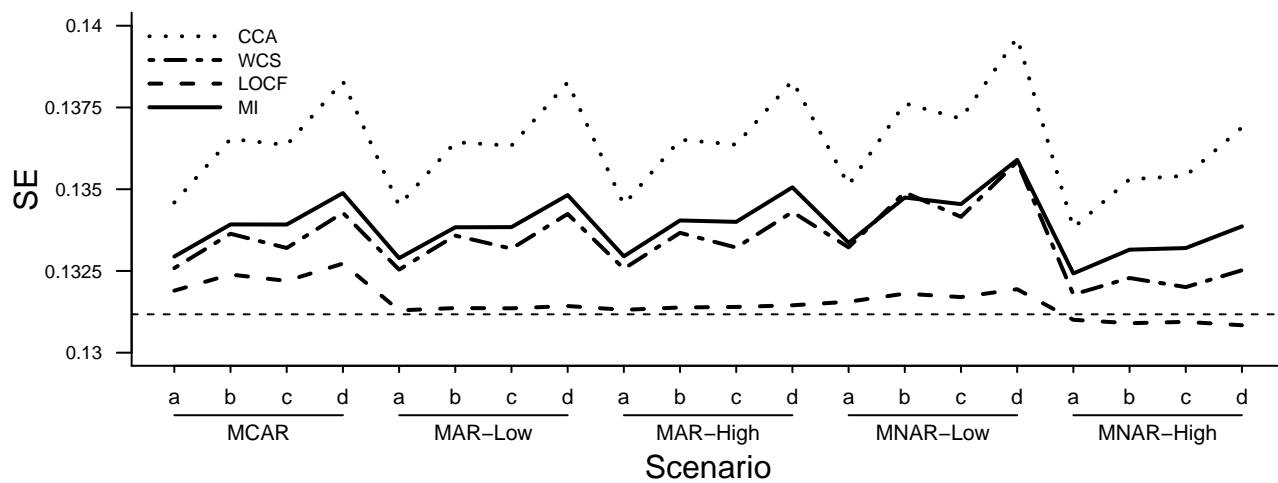

**Treatment Effect – Any Drinking (N = 500)**

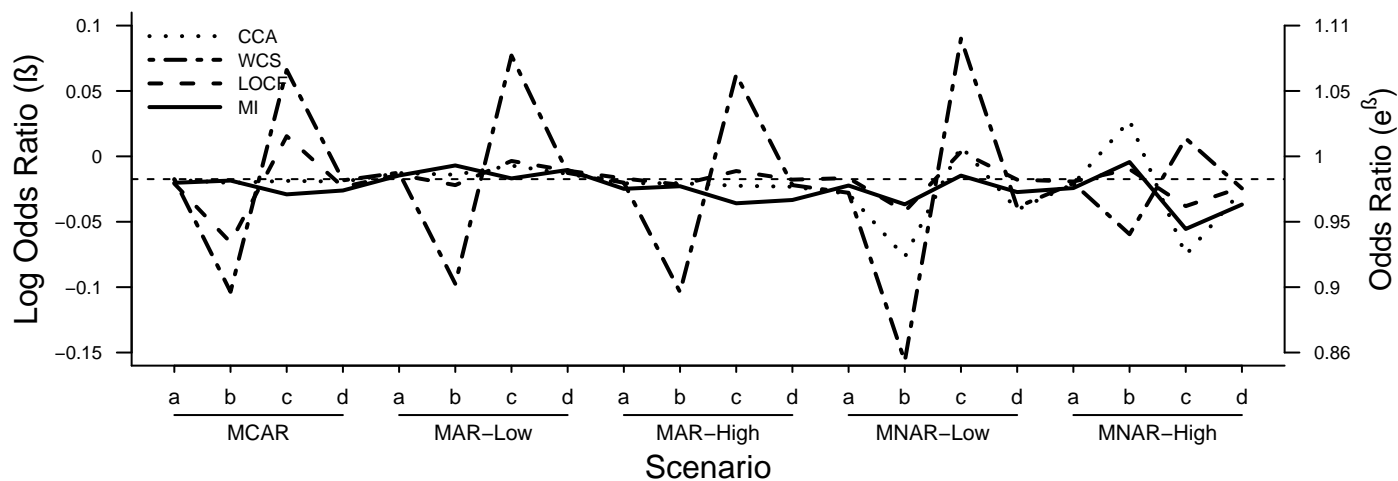

**Treatment Effect Standard Error – Any Drinking**

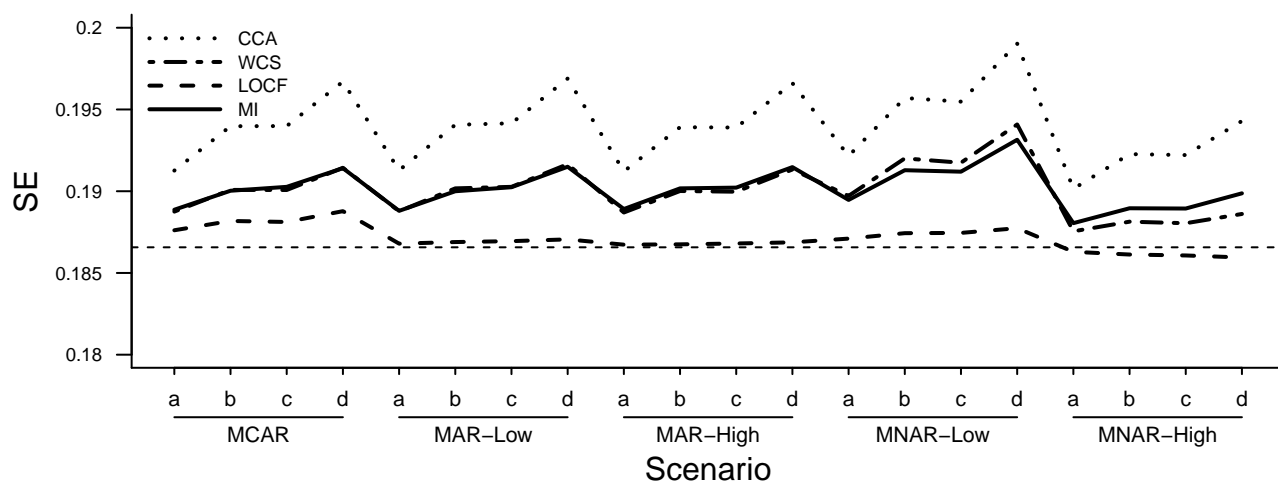

### Treatment Effect – Any Drinking (N = 200)

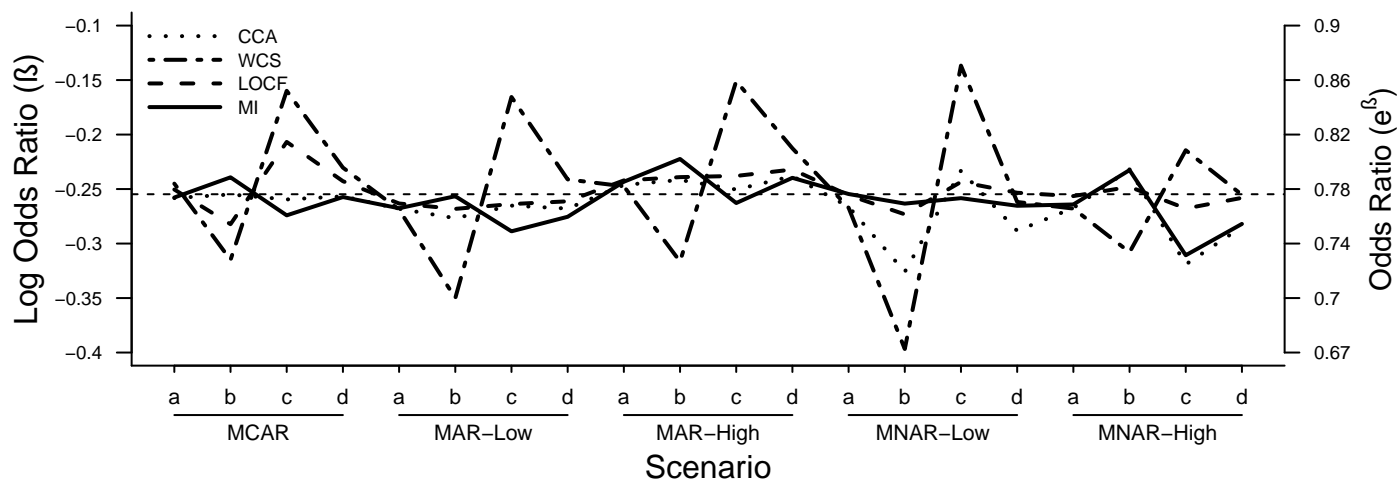

### Treatment Effect Standard Error – Any Drinking

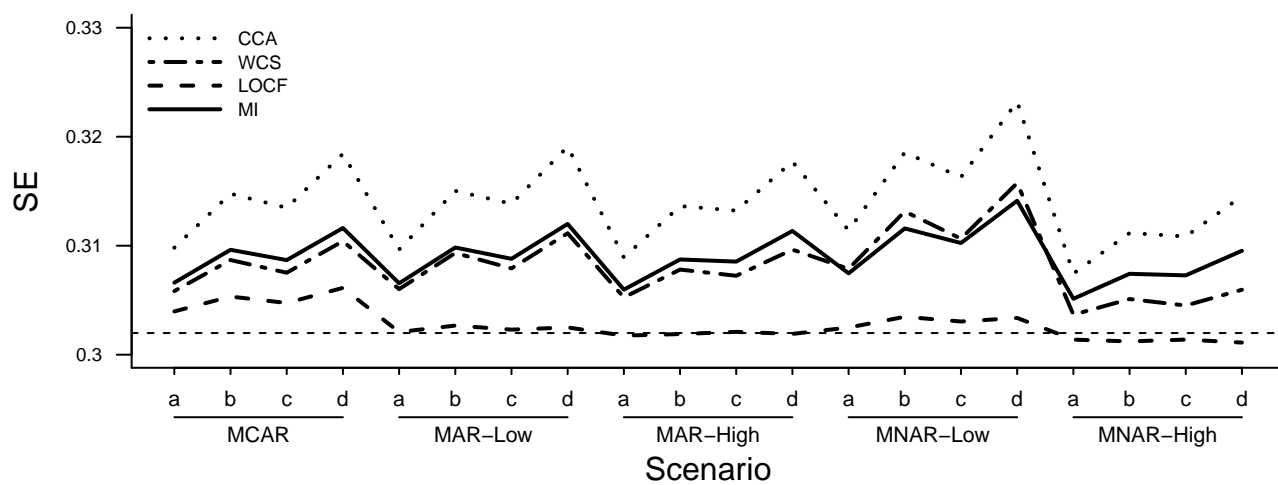



8. 5-10 percent missing, Any Heavy Drinking, N = 1000

Treatment Effect – Any Heavy Drinking (N = 1000)

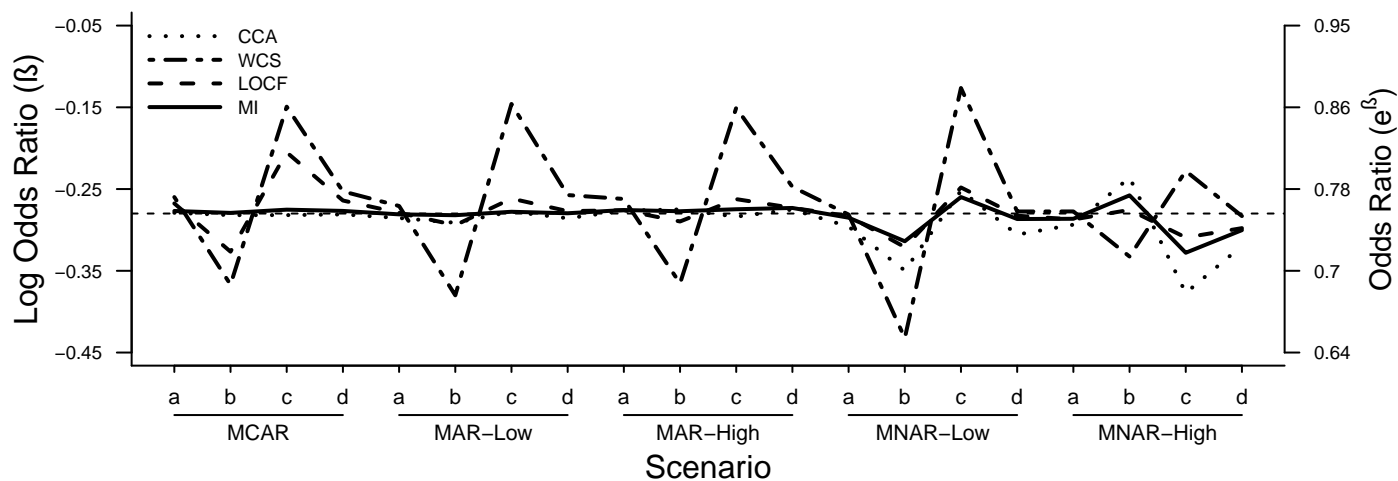

Treatment Effect Standard Error – Any Heavy Drinking

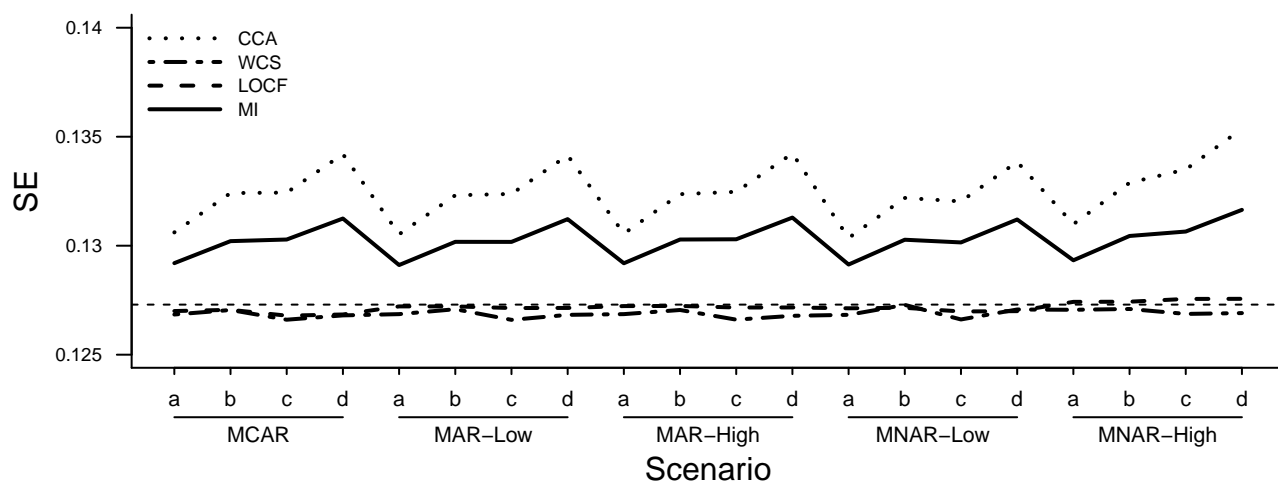

Treatment Effect – Any Heavy Drinking (N = 500)

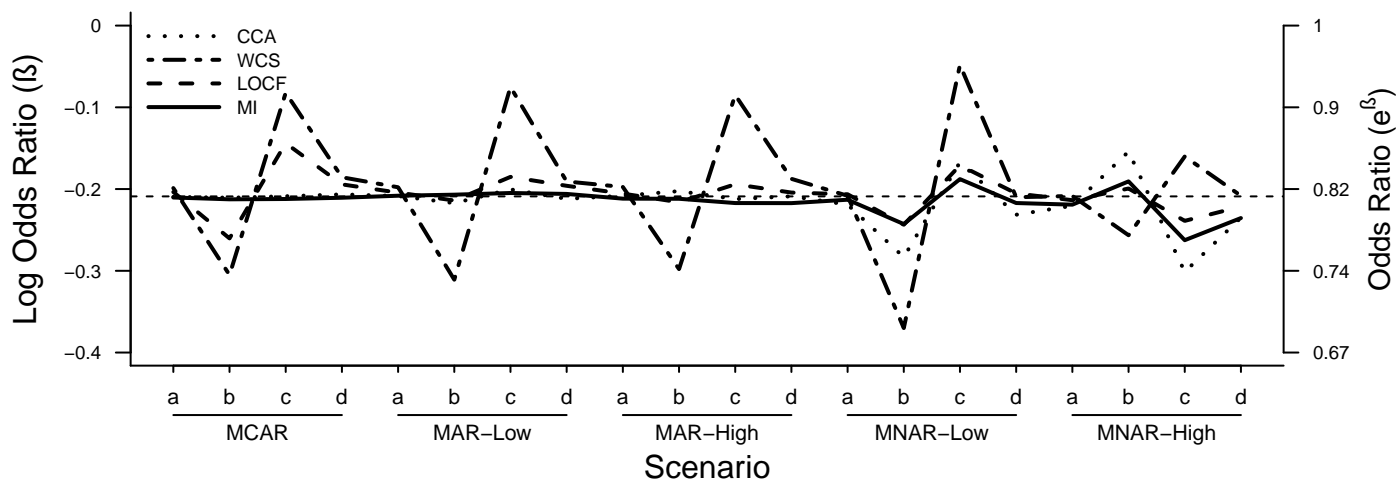

Treatment Effect Standard Error – Any Heavy Drinking

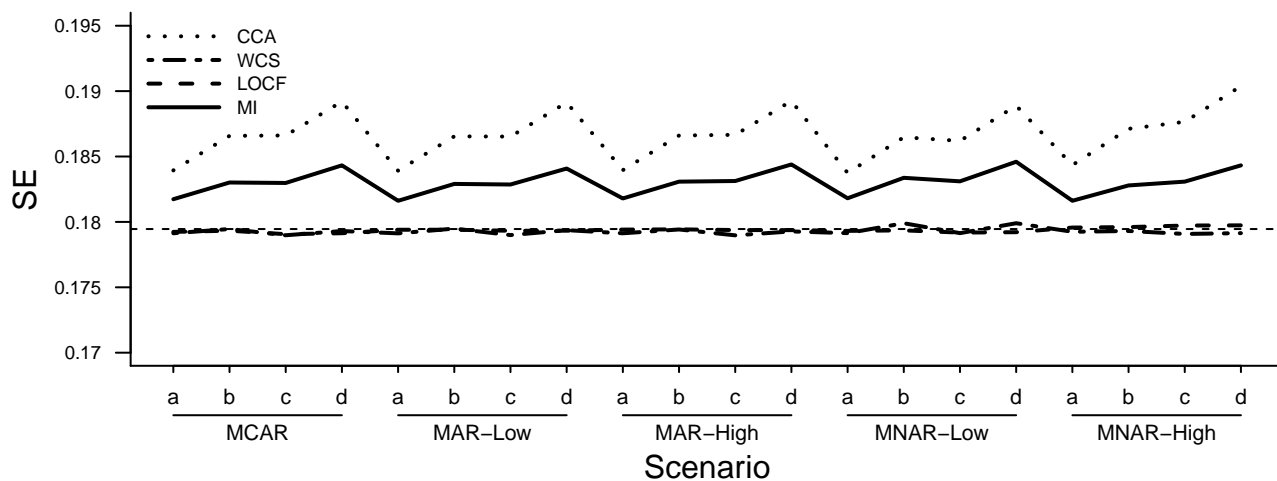

10. 5-10 percent missing, Any Heavy Drinking, N = 200

Treatment Effect – Any Heavy Drinking (N = 200)

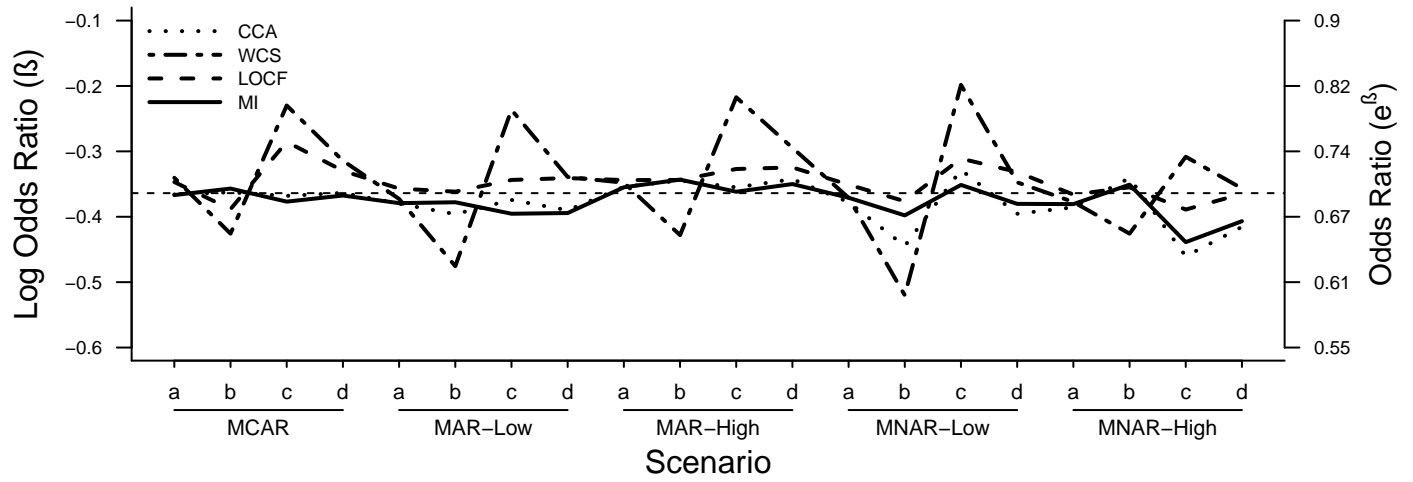

Treatment Effect Standard Error – Any Heavy Drinking

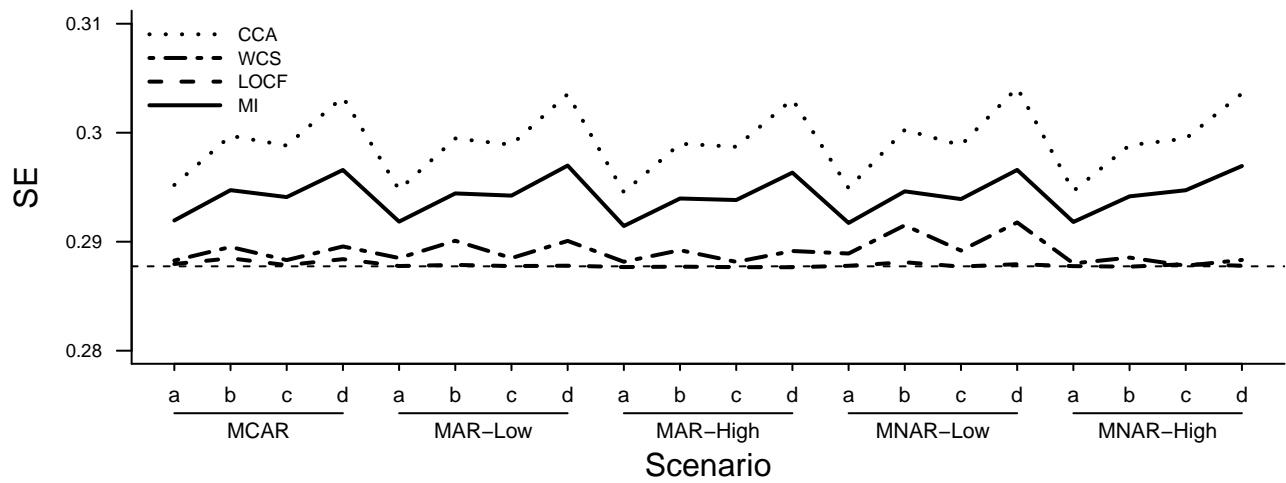

11. 25-30 percent missing, Any Drinking, LOCF only

**Treatment Effect – Any Drinking (N = 1000)**

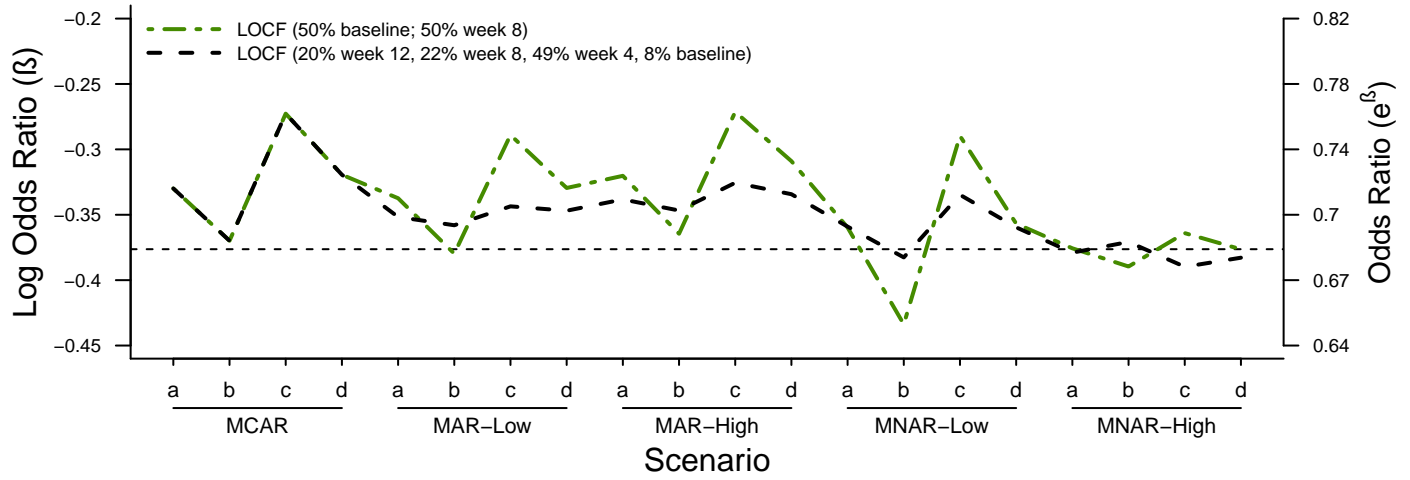

**Treatment Effect – Any Drinking (N = 500)**

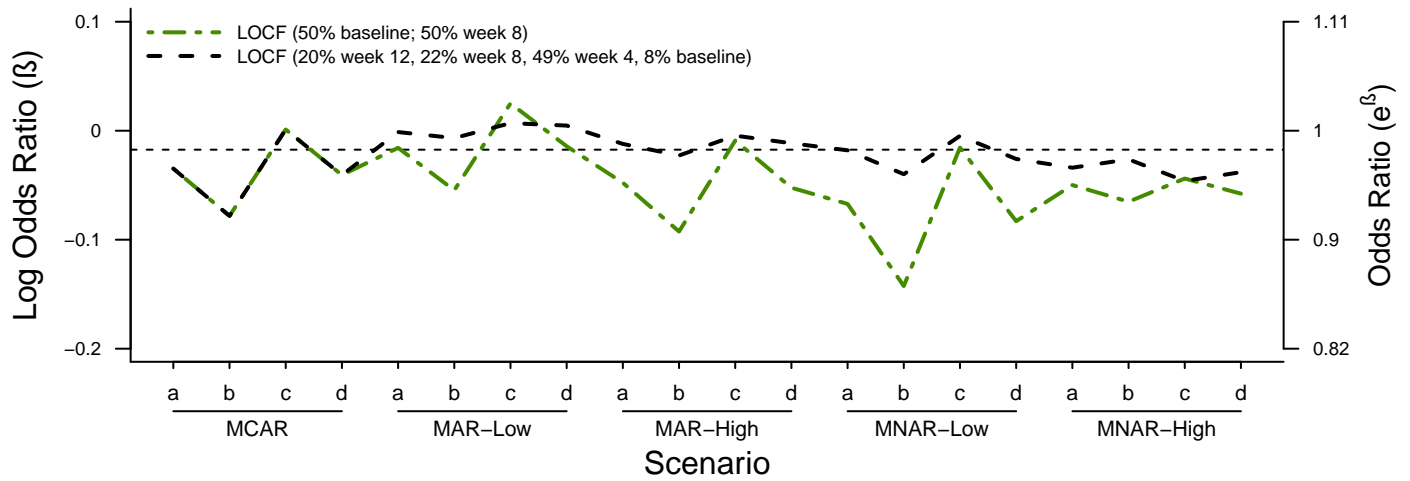

**Treatment Effect – Any Drinking (N = 200)**

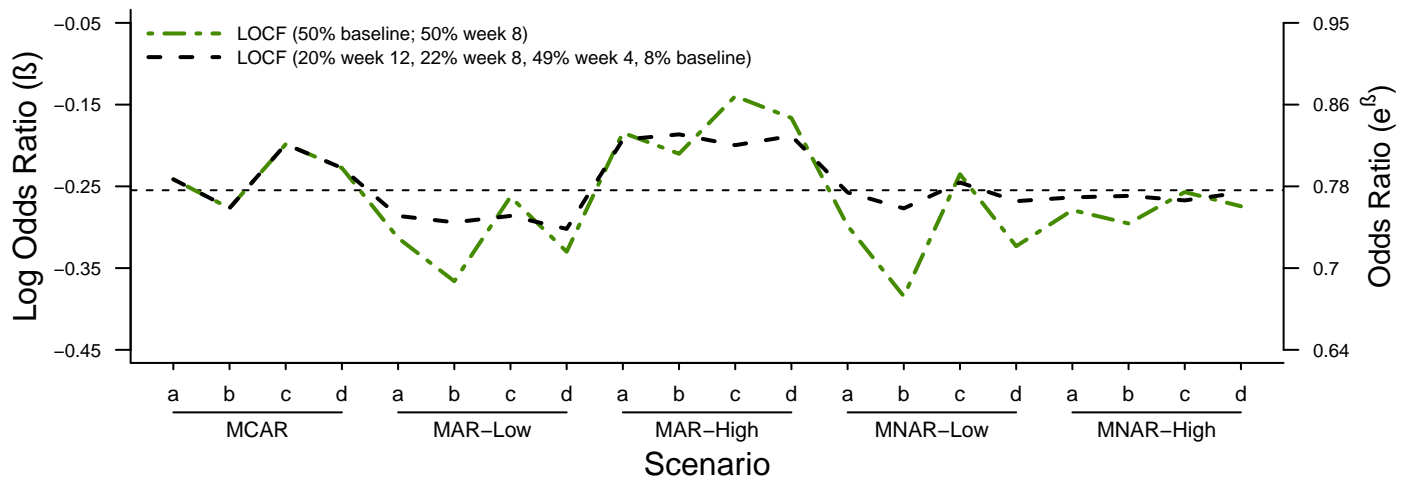

12. 25-30 percent missing, Any Heavy Drinking, LOCF only

**Treatment Effect – Any Heavy Drinking (N = 1000)**

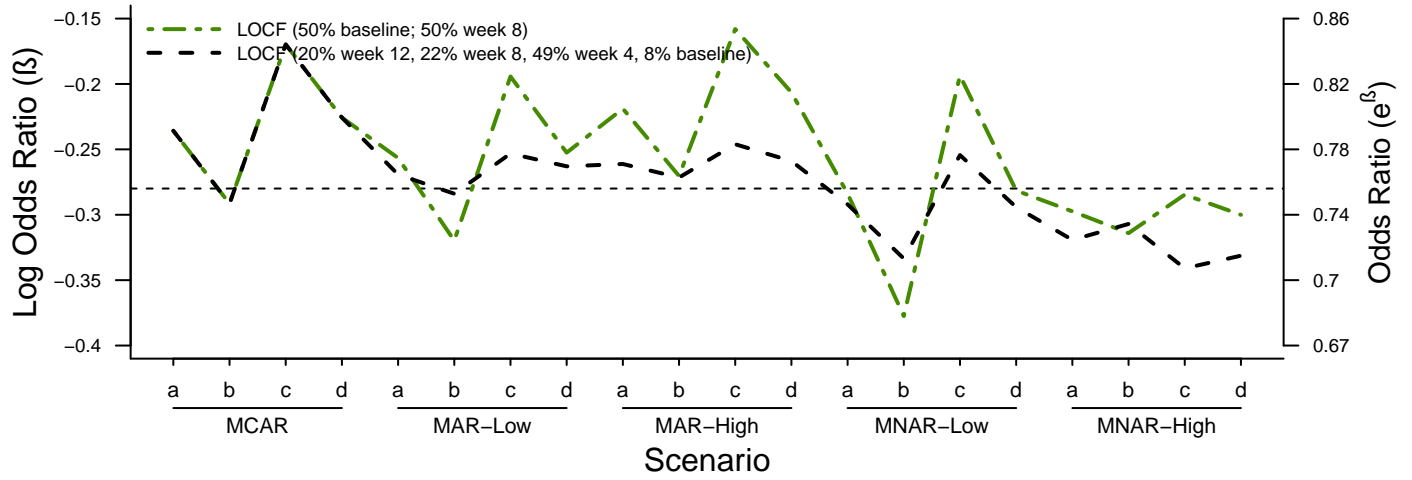

**Treatment Effect – Any Heavy Drinking (N = 500)**

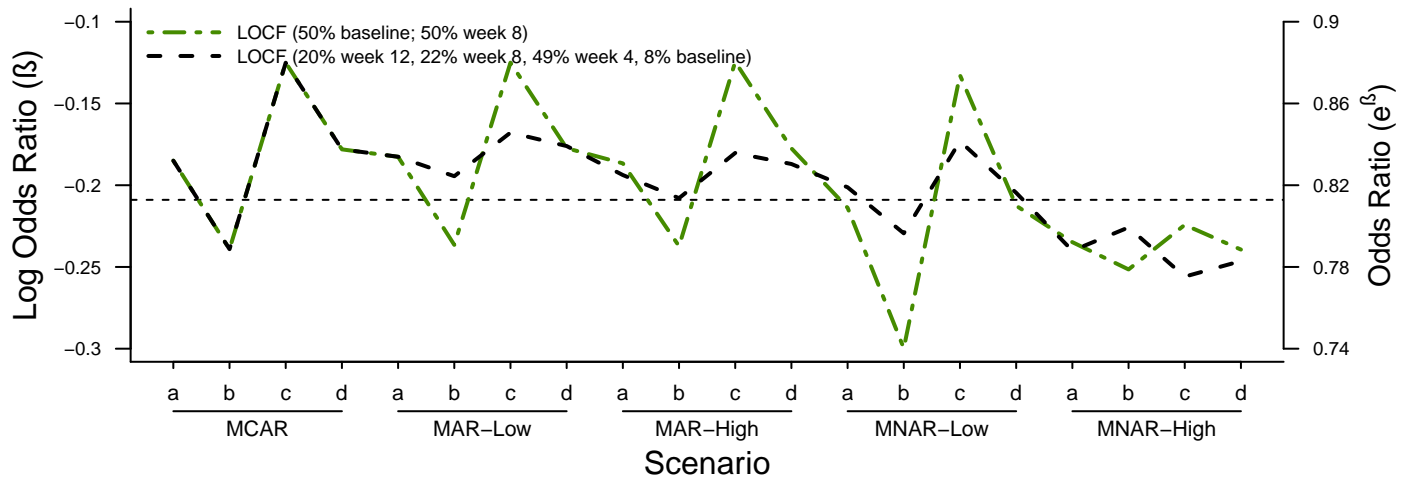

**Treatment Effect – Any Heavy Drinking (N = 200)**

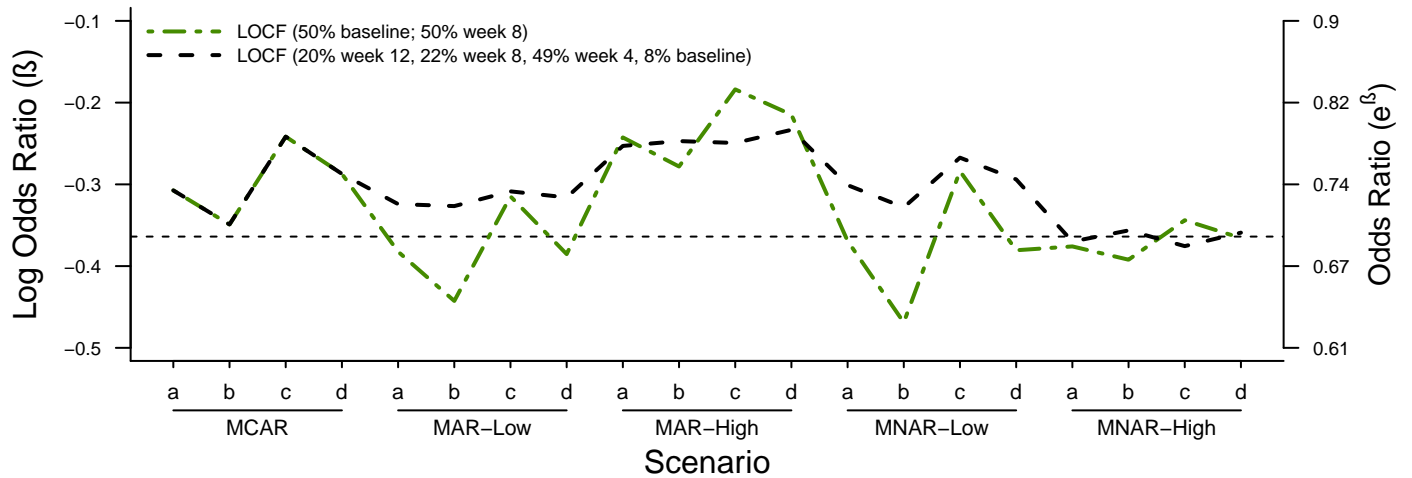

### Treatment Effect – Any Drinking (N = 1000)

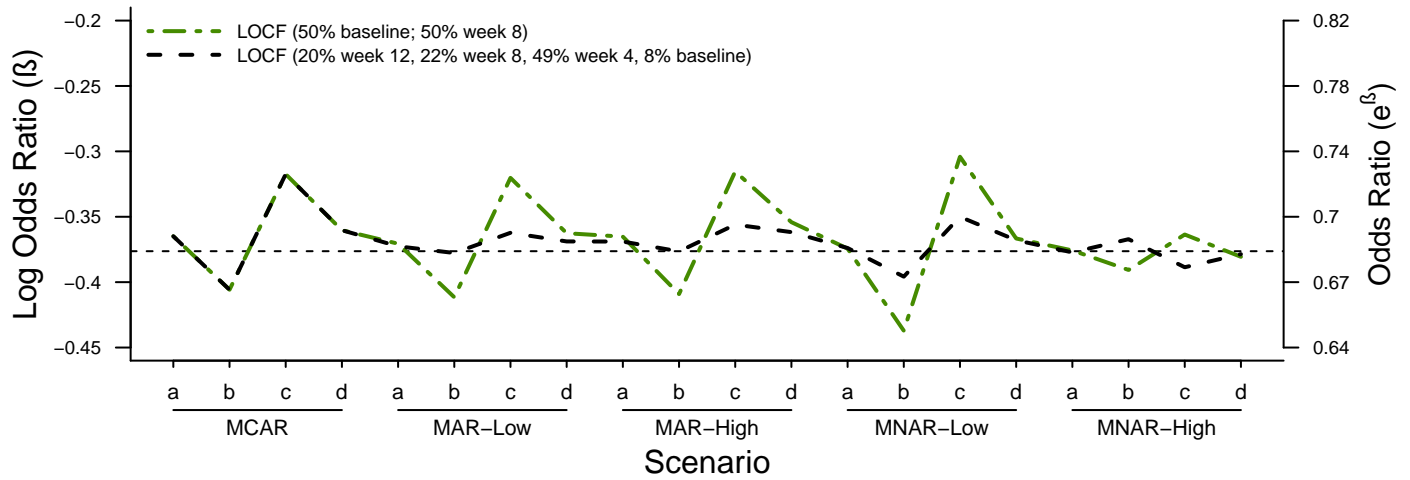

### Treatment Effect – Any Drinking (N = 500)

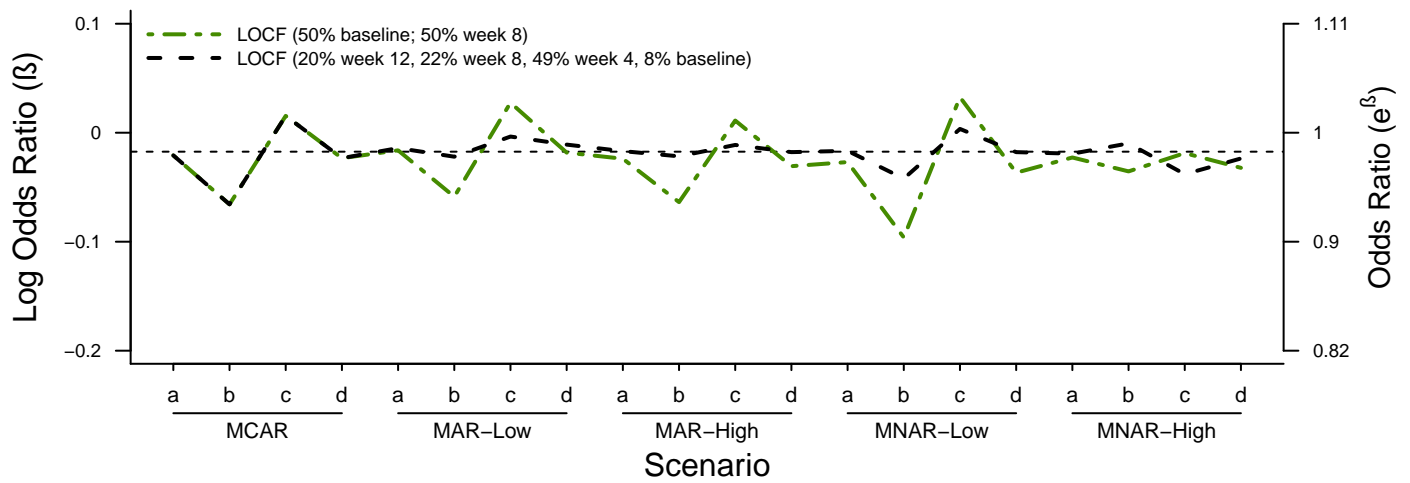

### Treatment Effect – Any Drinking (N = 200)

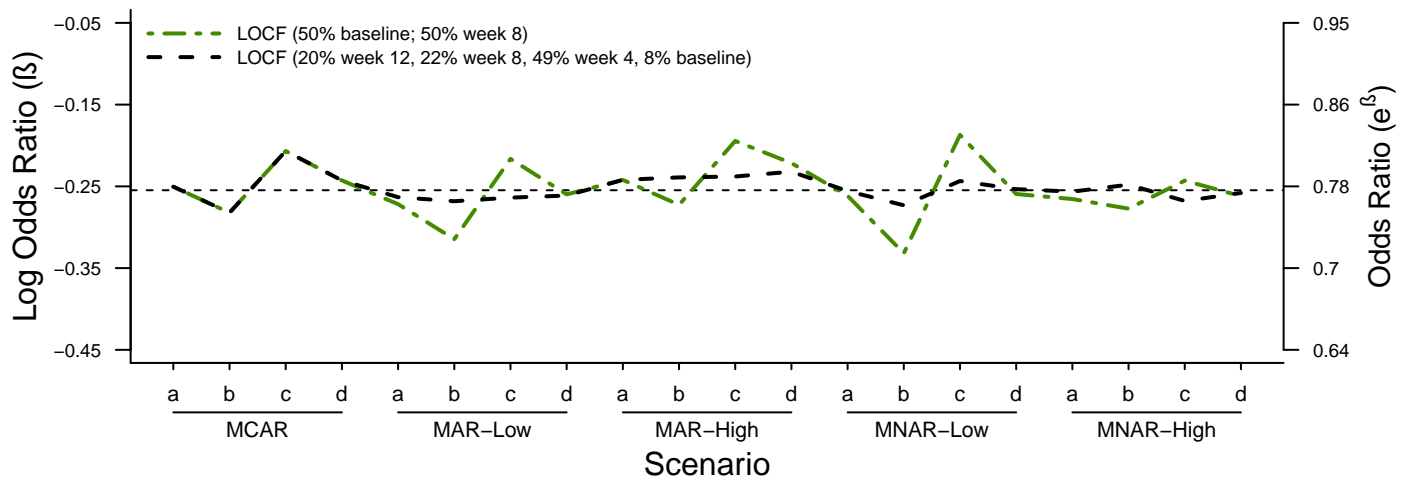

14. 5-10 percent missing, Any Heavy Drinking, LOCF only

**Treatment Effect – Any Heavy Drinking (N = 1000)**

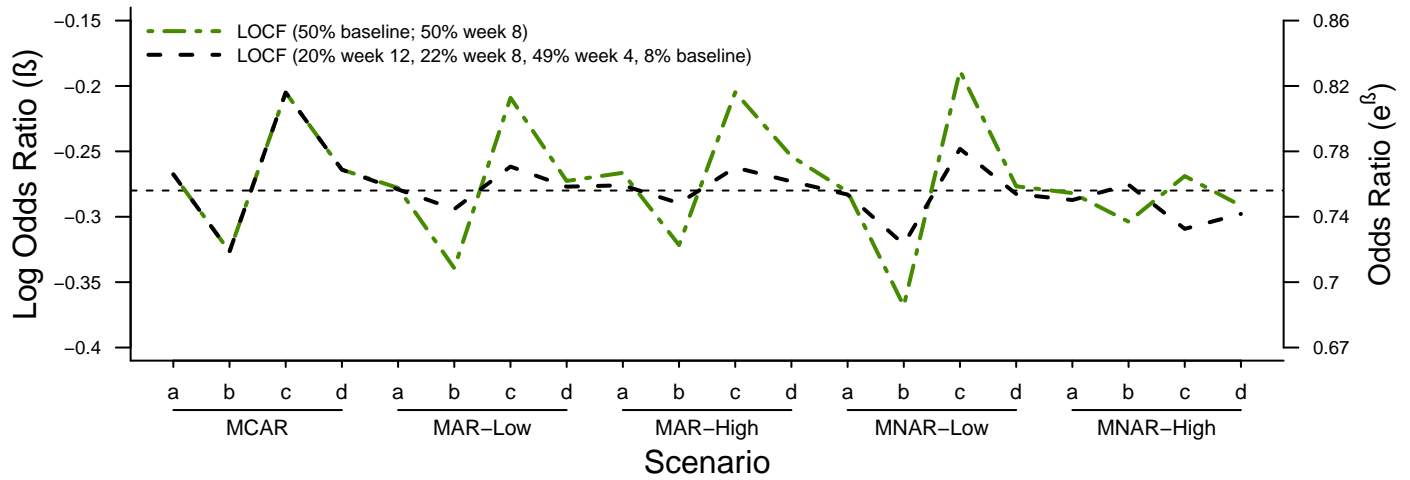

**Treatment Effect – Any Heavy Drinking (N = 500)**

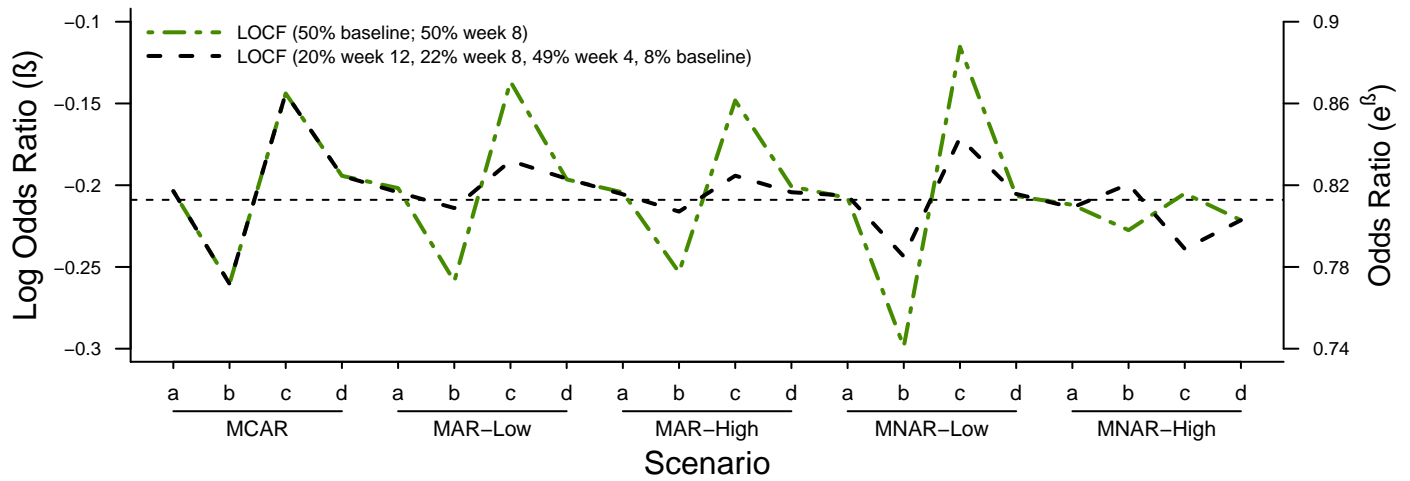

**Treatment Effect – Any Heavy Drinking (N = 200)**

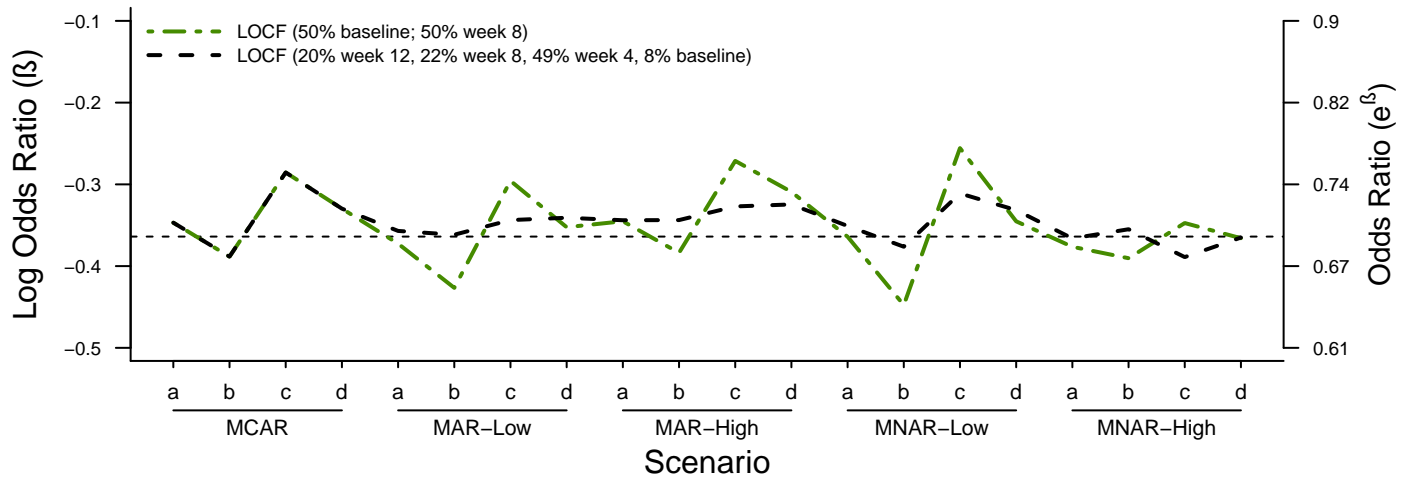

Supplement: NIHMS874847-supplement-Supp_info.pdf [file NIHMS874847-supplement-Supp_info.pdf]
